# Supplementary material for: Targeting cathepsin C ameliorates murine acetaminophen-induced liver injury
Source: Theranostics. 2024 May 13;14(8):3029–42. doi: 10.7150/thno.96092 (PMC11155399; doi:10.7150/thno.96092)
Supplement: Supplementary file 1 — Supplementary figures and table. [file thnov14p3029s1.pdf]

Figure S1

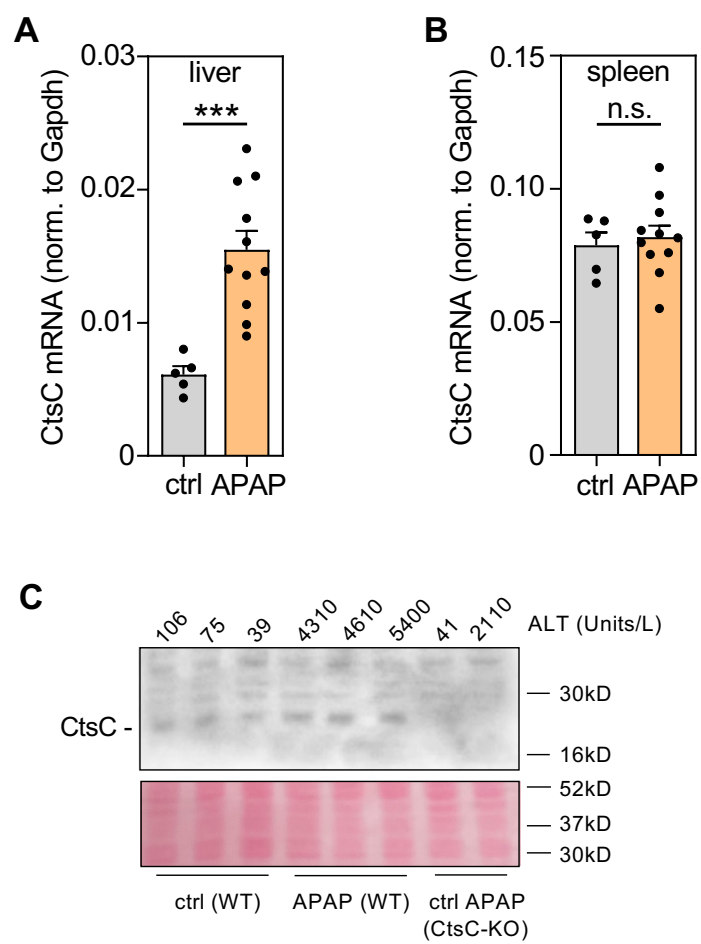

## Legend Figure S1

**CtsC gene expression in APAP-induced ALI. A–B** Male C57BL/6J mice received either 0.9% NaCl (ctrl, n = 5) or APAP at 300 mg/kg (n = 11). After 30 h, splenic/hepatic tissues and sera were analyzed (see Fig. 1A–D). Splenic (A) and hepatic (B) mRNA expression of CtsC in these same mice was analyzed using realtime PCR. Target mRNA normalized to Gapdh is shown as absolute values (\*\*p < 0.01). **C** Male WT and CtsC-deficient (CtsC-KO) C57BL/6J mice received either 0.9% NaCl (ctrl) or APAP (300 mg/kg). After 30 h (protocol I) hepatic tissue and serum was analyzed (see Figure 2A–C). Mouse specimens were randomly selected for immunoblot analysis of CtsC. Linked ALT levels are additionally shown. In accord with previous data [26], murine CtsC protein produced a specific band at 25 kD which, as expected, disappeared in CtsC-KO mice. In addition, a Ponceau S stain of the blot is shown. Statistical analysis: raw data were analyzed by unpaired Student's t-test and are shown as means ± SEM; n.s., not statistically significant.

Figure S2

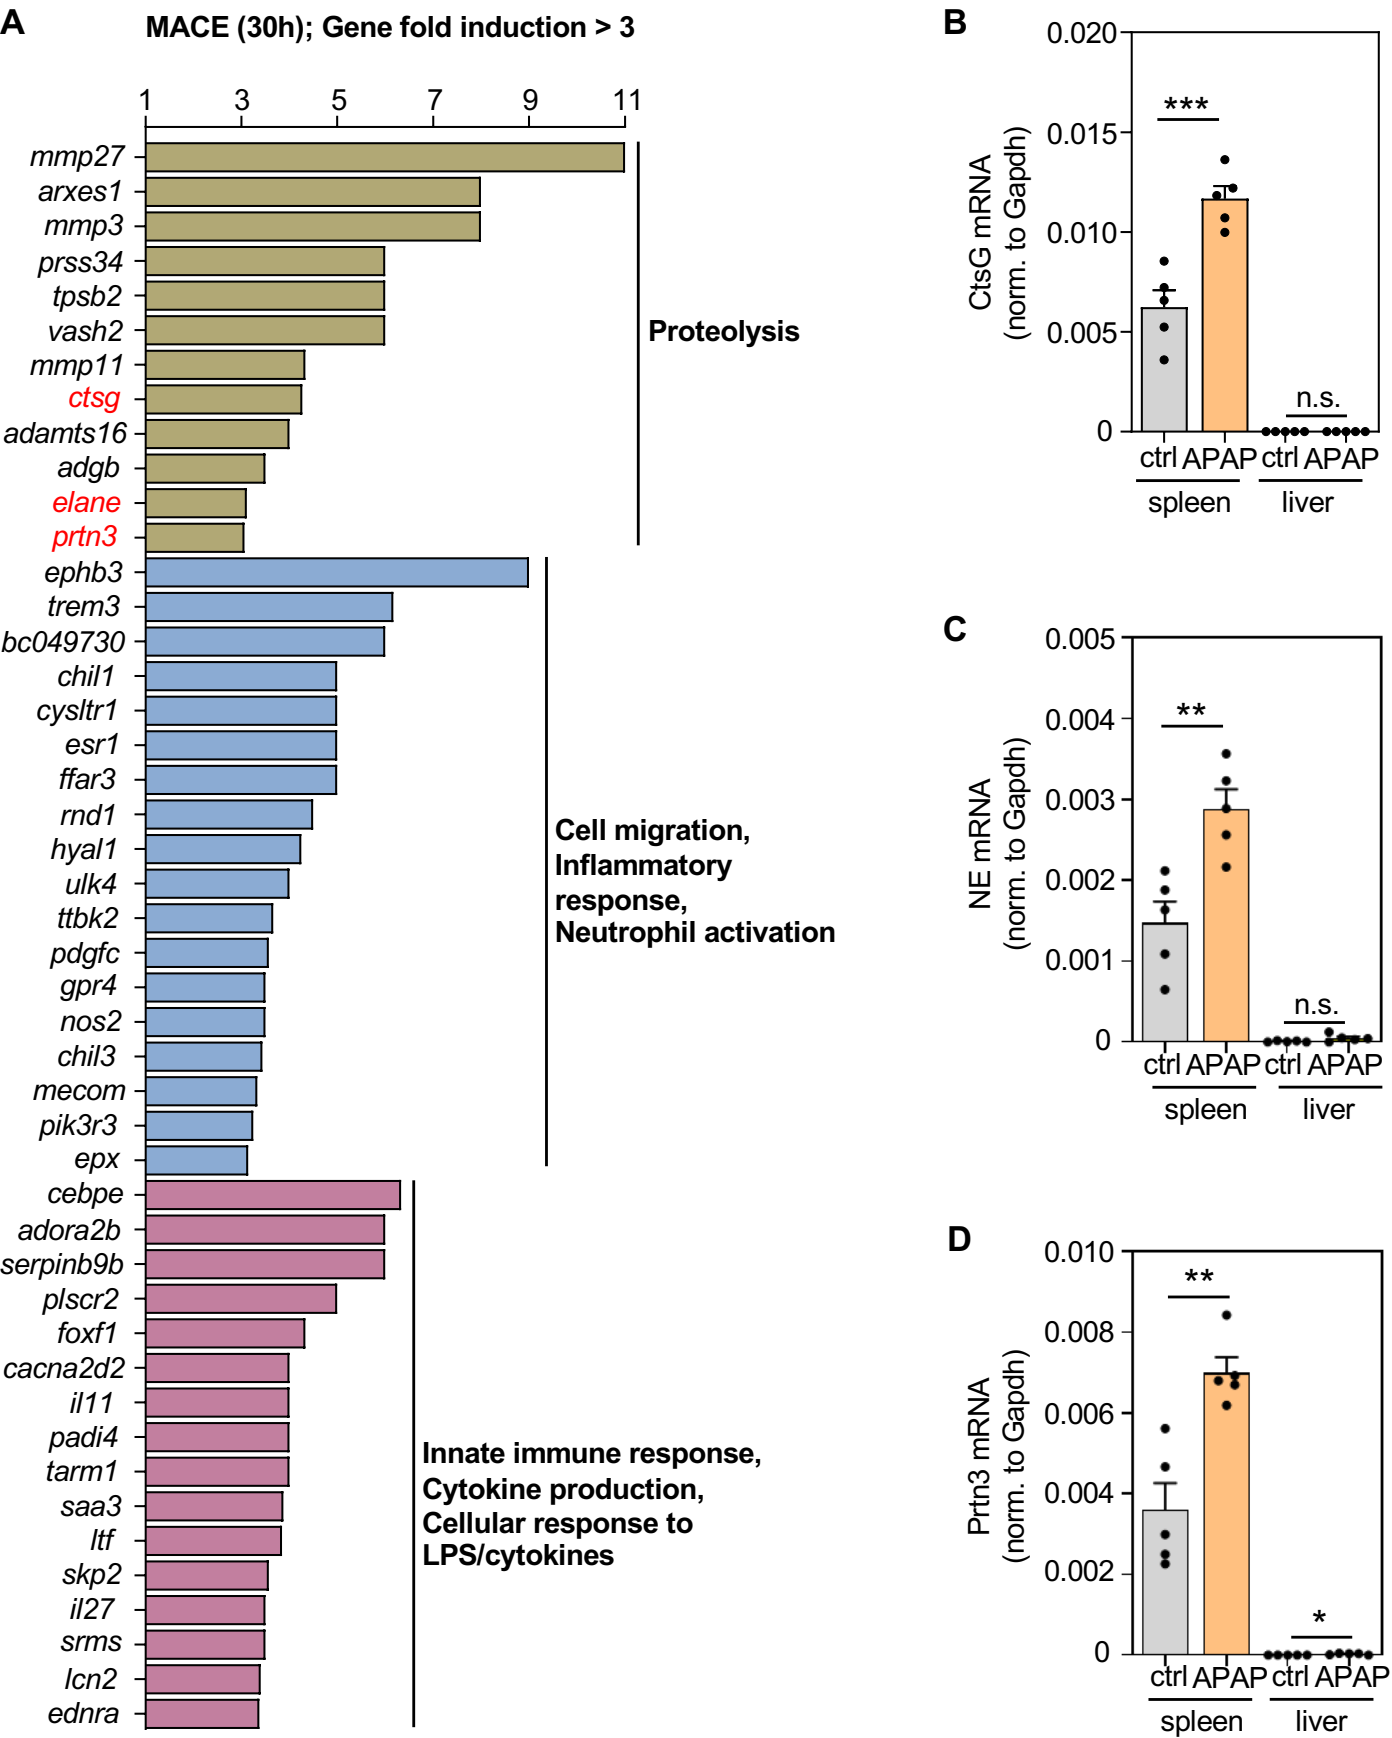

## Legend Figure S2

**Analysis of inflammatory splenic gene expression after APAP administration.** **A** Male WT C57BL/6J mice received 0.9% NaCl (ctrl, n = 5) or APAP at 300 mg/kg (n = 11). After 30h, experiments were terminated, and splenic/hepatic RNA was isolated. Splenic RNA was pooled (per experimental condition) in equal shares and global gene expression was evaluated by MACE as outlined in the methods section. Analysis disclosed gene induction of 302 genes (threshold: 3-fold gene induction by APAP treatment). Of those, 46 genes are depicted that could be grouped based on their 'MACE gene fold-induction' in selected 'GO biological processes' (<https://www.uniprot.org>) that relate to acute inflammation. **B–D** Male WT C57BL/6J mice received 0.9% NaCl (ctrl, n = 5) or APAP at 300 mg/kg (n = 5). These mice received two additional i.p. injections that were required for vehicle control in the context of a different study: one PBS injection 1h before APAP (or 0.9% NaCl as APAP vehicle) and one injection of 0.9% NaCl 2h after APAP (or 0.9% NaCl as APAP vehicle). 24h after APAP administration, splenic and hepatic mRNA expression of CtsG (**B**), NE (**C**), and Prtn3 (**D**) was verified using realtime PCR. Target mRNA normalized to Gapdh is shown as absolute values (\*p < 0.05, \*\*p < 0.01, \*\*\*p < 0.001). Statistical analysis: **B** (spleen) **CD**, raw data were analyzed by unpaired Student's *t*-test (ctrl *versus* APAP for spleen or liver, respectively) and are shown as means ± SEM; **B** (liver), raw data were analyzed by Mann-Whitney-U-test and are shown as raw data points; n.s., not statistically significant.

Table S1

| GO Term    | Description                                                                                     | P-value | FDR q-value | - log <sub>10</sub><br>(FDR q-value) |
|------------|-------------------------------------------------------------------------------------------------|---------|-------------|--------------------------------------|
| GO:0036342 | post-anal tail morphogenesis                                                                    | 3.43E-6 | 3.12E-2     | 1.505845406                          |
| GO:0022409 | positive regulation of cell-cell adhesion                                                       | 1.4E-5  | 6.35E-2     | 1.197226275                          |
| GO:1903039 | positive regulation of leukocyte cell-cell adhesion                                             | 3.53E-5 | 8.01E-2     | 1.096367484                          |
| GO:0022407 | regulation of cell-cell adhesion                                                                | 3.31E-5 | 1.00E-01    | 1                                    |
| GO:1900044 | regulation of protein K63-linked ubiquitination                                                 | 4.96E-4 | 1.5E-1      | 0.823908741                          |
| GO:0050867 | positive regulation of cell activation                                                          | 5.13E-4 | 1.5E-1      | 0.823908741                          |
| GO:0034165 | positive regulation of toll-like receptor 9 signaling pathway                                   | 4.96E-4 | 1.55E-1     | 0.809668302                          |
| GO:1904938 | planar cell polarity pathway involved in axon guidance                                          | 5.5E-4  | 1.56E-1     | 0.806875402                          |
| GO:0051251 | positive regulation of lymphocyte activation                                                    | 5.67E-4 | 1.56E-1     | 0.806875402                          |
| GO:0034163 | regulation of toll-like receptor 9 signaling pathway                                            | 4.96E-4 | 1.61E-1     | 0.793174124                          |
| GO:1902914 | regulation of protein polyubiquitination                                                        | 4.96E-4 | 1.67E-1     | 0.777283529                          |
| GO:0002684 | positive regulation of immune system process                                                    | 6.32E-4 | 1.69E-1     | 0.772113295                          |
| GO:1902916 | positive regulation of protein polyubiquitination                                               | 4.96E-4 | 1.73E-1     | 0.761953897                          |
| GO:1990266 | neutrophil migration                                                                            | 6.8E-4  | 1.77E-1     | 0.752026734                          |
| GO:1902523 | positive regulation of protein K63-linked ubiquitination                                        | 4.96E-4 | 1.8E-1      | 0.744727495                          |
| GO:0070425 | negative regulation of nucleotide-binding oligomerization domain containing signaling pathway   | 4.96E-4 | 1.88E-1     | 0.725842151                          |
| GO:0045785 | positive regulation of cell adhesion                                                            | 2.77E-4 | 1.93E-1     | 0.714442691                          |
| GO:0030593 | neutrophil chemotaxis                                                                           | 2.36E-4 | 1.94E-1     | 0.71219827                           |
| GO:0007411 | axon guidance                                                                                   | 3.86E-4 | 1.95E-1     | 0.709965389                          |
| GO:0070424 | regulation of nucleotide-binding oligomerization domain containing signaling pathway            | 4.96E-4 | 1.96E-1     | 0.707743929                          |
| GO:0002696 | positive regulation of leukocyte activation                                                     | 3.25E-4 | 1.97E-1     | 0.705533774                          |
| GO:0050870 | positive regulation of T cell activation                                                        | 2.19E-4 | 1.99E-1     | 0.701146924                          |
| GO:0051445 | regulation of meiotic cell cycle                                                                | 2.64E-4 | 1.99E-1     | 0.701146924                          |
| GO:0034501 | protein localization to kinetochore                                                             | 3.58E-4 | 2.03E-1     | 0.692503962                          |
| GO:0070433 | negative regulation of nucleotide-binding oligomerization domain containing 2 signaling pathway | 4.96E-4 | 2.05E-1     | 0.688246139                          |
| GO:0097485 | neuron projection guidance                                                                      | 3.86E-4 | 2.06E-1     | 0.68613278                           |
| GO:0033598 | mammary gland epithelial cell proliferation                                                     | 2.07E-4 | 2.09E-1     | 0.679853714                          |
| GO:1903037 | regulation of leukocyte cell-cell adhesion                                                      | 3.25E-4 | 2.11E-1     | 0.675717545                          |
| GO:0070432 | regulation of nucleotide-binding oligomerization domain containing 2 signaling pathway          | 4.96E-4 | 2.15E-1     | 0.66756154                           |
| GO:0035644 | phosphoanandamide dephosphorylation                                                             | 4.96E-4 | 2.25E-1     | 0.647817482                          |
| GO:0060744 | mammary gland branching involved in thelarche                                                   | 2.07E-4 | 2.35E-1     | 0.628932138                          |
| GO:0050860 | negative regulation of T cell receptor signaling pathway                                        | 4.96E-4 | 2.37E-1     | 0.625251654                          |
| GO:0060750 | epithelial cell proliferation involved in mammary gland duct elongation                         | 2.07E-4 | 2.68E-1     | 0.571865206                          |
| GO:0045621 | positive regulation of lymphocyte differentiation                                               | 1.92E-4 | 2.91E-1     | 0.536107011                          |
| GO:0045582 | positive regulation of T cell differentiation                                                   | 1.92E-4 | 3.49E-1     | 0.457174573                          |
